# Supplementary material for: Evaluation of four ground-based retrievals of cloud droplet number concentration in marine stratocumulus with aircraft in situ measurements
Source: Copernicus journal article supplement (doi:10.5194/amt-16-5827-2023), 2023-12-06
Supplement: Supplementary file 1 [file amt-16-5827-2023-supplement.pdf]

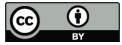

*Supplement of*

## **Evaluation of four ground-based retrievals of cloud droplet number concentration in marine stratocumulus with aircraft in situ measurements**

**Damao Zhang et al.**

*Correspondence to:* Damao Zhang (damao.zhang@pnnl.gov)

The copyright of individual parts of the supplement might differ from the article licence.

Table S1 Compare  $r_{em}$  retrievals and *in situ* probe measurements for the 12 selected flight days.

Numbers in parathesis is the absolute relative difference of  $r_{em}$  with respect to  $r_{em\_FCDP}$ .

| <b>Date</b> | $r_{em\_FCDP}$<br>$\mu\text{m}$ | $r_{em\_CAS}$<br>$\mu\text{m}$ | $r_{em\_mpl}$<br>$\mu\text{m}$ | $r_{em\_rl}$<br>$\mu\text{m}$ | $r_{em\_radar}$<br>$\mu\text{m}$ | $r_{em\_vap}$<br>$\mu\text{m}$ |
|-------------|---------------------------------|--------------------------------|--------------------------------|-------------------------------|----------------------------------|--------------------------------|
| 2017/06/21  | 9.6                             | 9.4 (-0.2)                     | 10.8 (1.2)                     | n/a                           | 9.5 (-0.1)                       | 7.8 (-1.8)                     |
| 2017/06/28  | 6.6                             | 7.6 (1.0)                      | 10.9 (4.3)                     | 13.7 (7.1)                    | 8.8 (2.2)                        | 8.0 (1.4)                      |
| 2017/06/30  | 6.4                             | 7.2 (0.8)                      | 6.5 (0.1)                      | 6.0 (-0.4)                    | 8.9 (2.5)                        | 7.3 (0.9)                      |
| 2017/07/06  | 9.6                             | 10.0 (0.4)                     | 9.0 (-0.6)                     | 8.5 (-1.1)                    | 10.1 (0.5)                       | 9.8 (0.2)                      |
| 2017/07/08  | 7.8                             | 8.4 (0.6)                      | 9.8 (2.0)                      | 12.7 (4.9)                    | 8.8 (1.1)                        | 8.0 (0.2)                      |
| 2017/07/18  | 12.7                            | 13.1 (0.4)                     | 13.5 (0.8)                     | 15.9 (3.2)                    | 12.5 (-0.2)                      | 12.9 (0.2)                     |
| 2018/01/19  | 12.5                            | 12.6 (0.1)                     | 13.5 (1.0)                     | 11.9 (-0.6)                   | 11.3 (-1.2)                      | 14.0 (1.5)                     |
| 2018/01/25  | 11.6                            | 11.6 (0.0)                     | 13.6 (2.0)                     | 11.1 (-0.5)                   | 12.3 (0.7)                       | 14.8 (3.2)                     |
| 2018/01/26  | 11.0                            | 10.8 (-0.2)                    | 11.2 (0.2)                     | 9.5 (-1.4)                    | 11.7 (0.7)                       | 10.3 (-0.7)                    |
| 2018/01/30  | 9.5                             | 9.4 (-0.1)                     | 11.1 (1.6)                     | 9.5 (0.0)                     | 10.4 (0.9)                       | 11.6 (2.1)                     |
| 2018/02/07  | 10.0                            | 9.8 (-0.2)                     | 9.9 (-0.1)                     | 7.5 (-2.6)                    | 10.3 (0.3)                       | 10.3 (0.3)                     |
| 2018/02/12  | 8.1                             | 8.4 (0.3)                      | 9.9 (1.8)                      | 7.9 (-0.2)                    | 9.4 (1.3)                        | 9.5 (1.4)                      |

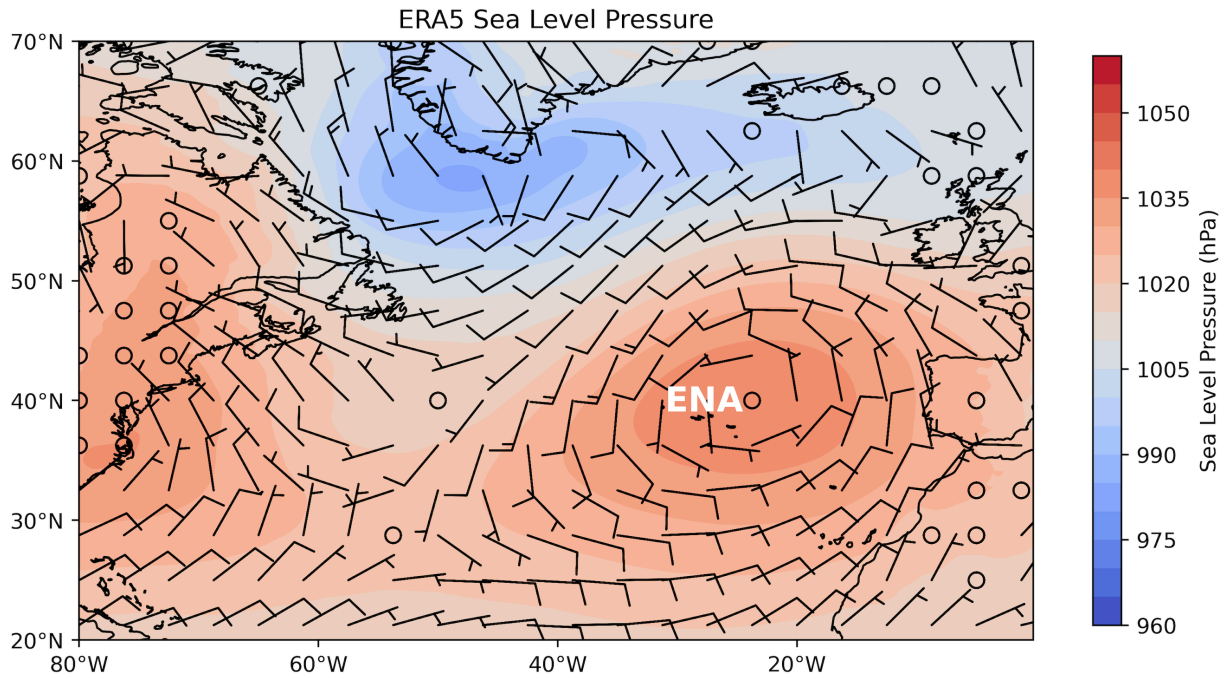

Fig. S1. The average mean sea level pressure and 10-meter wind across the ENA observatory between 5:00 UTC January 25 and 12 UTC January 27, 2018 based on the hourly ECMWF ERA5 reanalysis data (Hersbach et al., 2020).

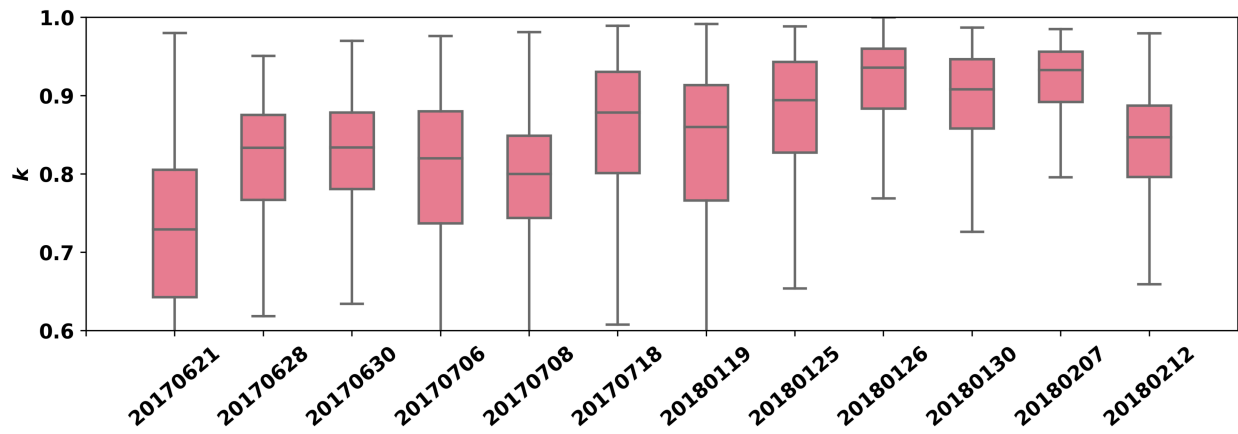

Fig. S2. The  $k$  parameter values during the 12 selected flight days.

## References

Hersbach, H, Bell, B, Berrisford, P, et al. The ERA5 global reanalysis. *Q J R Meteorol Soc.* 2020; 146: 1999– 2049. <https://doi.org/10.1002/qj.3803>.
